# Supplementary material for: Melatonin enhances the anti-tumor effect of sorafenib via AKT/p27-mediated cell cycle arrest in hepatocarcinoma cell lines
Source: Royal Society of Chemistry journal article supplement (doi:10.1039/c7ra02113e), 2017-01-01
Supplement: c7ra02113e1.pdf [file c7ra02113e1.pdf]

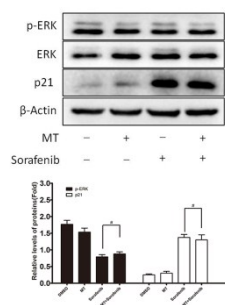

Supplementary Fig. S1 Bel-7402 cells were treated with MT [1.0 mM] or/and sorafenib [8.0  $\mu$ M] for 48 hours. Expressions of relevant proteins in cell lysates were detected using western blot. The data are presented as mean  $\pm$  SD of three separate experiments. (#  $P > 0.05$  represents no significant differences among groups.)
